# Supplementary material for: Single atom supported on MXenes for the alkaline hydrogen evolution reaction: species, coordination environment, and action mechanism
Source: Royal Society of Chemistry journal article supplement (doi:10.1039/d3cp00779k), 2023-01-01
Supplement: d3cp00779k1.pdf [file d3cp00779k1.pdf]

## Support Information

### Single-atom supported on MXenes for alkaline hydrogen evolution reaction: species, coordination environment, and action mechanism

Zijun Sun <sup>1,2</sup>, Rui Li <sup>1,2,\*</sup>, Qing Xi <sup>1,2</sup>, Fangxia Xie <sup>1,2</sup>, Xuan Jian <sup>3</sup>, Xiaoming Gao <sup>3</sup>, Houfen Li <sup>1</sup>, Zhuobin Yu <sup>1</sup>, Jianxin Liu <sup>1,2</sup>, Xiaochao Zhang <sup>2</sup>, Yawen Wang <sup>2</sup>, Yunfang Wang <sup>2</sup>, Xiuping Yue <sup>1,2,\*</sup>, Caimei Fan <sup>1,2</sup>

<sup>1</sup> *College of Environmental Science and Engineering, Taiyuan University of Technology,*

*Taiyuan 030024, P. R. China*

<sup>2</sup> *College of Chemical Engineering and Technology, Taiyuan University of Technology,*

*Taiyuan 030024, P. R. China*

<sup>3</sup> *College of Chemistry and Chemical Engineering, Shaanxi Key Laboratory of Chemical*

*Reaction Engineering, Yan'an University, Yan'an 716000, P. R. China*

\*Co-corresponding author.

Tel.: +86 13233699182; +86 13068076599; fax: +86 351 6018554.

*E-mail address:* lirui13233699182@163.com (Li R); yuexiuping@tyut.edu.cn (Yue XP).

**Table S1** Mo-based MXenes alkaline HER performance descriptor.

| Mo-based MXenes                                               | $\Delta G_{*H_2O}$ (eV) | $\Delta G_{*H-OH}$ (eV) | $\Delta G_{*H}$ (eV) | $\Delta G_{*OH}$ (eV) |
|---------------------------------------------------------------|-------------------------|-------------------------|----------------------|-----------------------|
| Mo <sub>2</sub> CO <sub>2</sub>                               | 0.486                   | 2.204                   | -0.430               | -2.291                |
| Mo <sub>2</sub> TiC <sub>2</sub> O <sub>2</sub>               | 0.348                   | 2.767                   | -0.373               | -2.658                |
| Mo <sub>2</sub> Ti <sub>2</sub> C <sub>2</sub> O <sub>2</sub> | 0.379                   | 2.775                   | -0.229               | -2.553                |

**Table S2** Ground state magnetic moment of TM single atom in TM-Mo<sub>2</sub>Ti<sub>2</sub>C<sub>3</sub>O<sub>2</sub> systems (in Bohr magnetons,  $\mu_B$ ).

| TM-Mo <sub>2</sub> Ti <sub>2</sub> C <sub>3</sub> O <sub>2</sub>               | Magnetic moment ( $\mu_B$ ) | TM-Mo <sub>2</sub> Ti <sub>2</sub> C <sub>3</sub> O <sub>2</sub>               | Magnetic moment ( $\mu_B$ ) |
|--------------------------------------------------------------------------------|-----------------------------|--------------------------------------------------------------------------------|-----------------------------|
| Fe <sub>A</sub> -Mo <sub>2</sub> Ti <sub>2</sub> C <sub>3</sub> O <sub>2</sub> | 0                           | Co <sub>A</sub> -Mo <sub>2</sub> Ti <sub>2</sub> C <sub>3</sub> O <sub>2</sub> | 0                           |
| Fe <sub>B</sub> -Mo <sub>2</sub> Ti <sub>2</sub> C <sub>3</sub> O <sub>2</sub> | 3.277                       | Co <sub>B</sub> -Mo <sub>2</sub> Ti <sub>2</sub> C <sub>3</sub> O <sub>2</sub> | -0.004                      |
| Fe <sub>S</sub> -Mo <sub>2</sub> Ti <sub>2</sub> C <sub>3</sub> O <sub>2</sub> | 2.952                       | Co <sub>S</sub> -Mo <sub>2</sub> Ti <sub>2</sub> C <sub>3</sub> O <sub>2</sub> | 0.005                       |
| Ni <sub>A</sub> -Mo <sub>2</sub> Ti <sub>2</sub> C <sub>3</sub> O <sub>2</sub> | 0                           | Ru <sub>A</sub> -Mo <sub>2</sub> Ti <sub>2</sub> C <sub>3</sub> O <sub>2</sub> | 0                           |
| Ni <sub>B</sub> -Mo <sub>2</sub> Ti <sub>2</sub> C <sub>3</sub> O <sub>2</sub> | 0                           | Ru <sub>B</sub> -Mo <sub>2</sub> Ti <sub>2</sub> C <sub>3</sub> O <sub>2</sub> | 2.574                       |
| Ni <sub>S</sub> -Mo <sub>2</sub> Ti <sub>2</sub> C <sub>3</sub> O <sub>2</sub> | 0                           | Ru <sub>S</sub> -Mo <sub>2</sub> Ti <sub>2</sub> C <sub>3</sub> O <sub>2</sub> | 1.970                       |
| Rh <sub>A</sub> -Mo <sub>2</sub> Ti <sub>2</sub> C <sub>3</sub> O <sub>2</sub> | 0                           | Pd <sub>A</sub> -Mo <sub>2</sub> Ti <sub>2</sub> C <sub>3</sub> O <sub>2</sub> | 0                           |
| Rh <sub>B</sub> -Mo <sub>2</sub> Ti <sub>2</sub> C <sub>3</sub> O <sub>2</sub> | 1.645                       | Pd <sub>B</sub> -Mo <sub>2</sub> Ti <sub>2</sub> C <sub>3</sub> O <sub>2</sub> | 0.291                       |
| Rh <sub>S</sub> -Mo <sub>2</sub> Ti <sub>2</sub> C <sub>3</sub> O <sub>2</sub> | 0.668                       | Pd <sub>S</sub> -Mo <sub>2</sub> Ti <sub>2</sub> C <sub>3</sub> O <sub>2</sub> | 0                           |
| Os <sub>A</sub> -Mo <sub>2</sub> Ti <sub>2</sub> C <sub>3</sub> O <sub>2</sub> | 0                           | Ir <sub>A</sub> -Mo <sub>2</sub> Ti <sub>2</sub> C <sub>3</sub> O <sub>2</sub> | 0                           |
| Os <sub>B</sub> -Mo <sub>2</sub> Ti <sub>2</sub> C <sub>3</sub> O <sub>2</sub> | 2.598                       | Ir <sub>B</sub> -Mo <sub>2</sub> Ti <sub>2</sub> C <sub>3</sub> O <sub>2</sub> | 1.582                       |
| Os <sub>S</sub> -Mo <sub>2</sub> Ti <sub>2</sub> C <sub>3</sub> O <sub>2</sub> | 1.964                       | Ir <sub>S</sub> -Mo <sub>2</sub> Ti <sub>2</sub> C <sub>3</sub> O <sub>2</sub> | 0.276                       |
| Pt <sub>A</sub> -Mo <sub>2</sub> Ti <sub>2</sub> C <sub>3</sub> O <sub>2</sub> | 0                           |                                                                                |                             |
| Pt <sub>B</sub> -Mo <sub>2</sub> Ti <sub>2</sub> C <sub>3</sub> O <sub>2</sub> | 0.716                       |                                                                                |                             |
| Pt <sub>S</sub> -Mo <sub>2</sub> Ti <sub>2</sub> C <sub>3</sub> O <sub>2</sub> | 0                           |                                                                                |                             |

**Table S3** Ru-Mo<sub>2</sub>Ti<sub>2</sub>C<sub>3</sub>O<sub>2</sub> alkaline HER performance descriptor.

| TM-Mo <sub>2</sub> Ti <sub>2</sub> C <sub>3</sub> O <sub>2</sub>               | $\Delta G_{*H_2O}$ (eV) | $\Delta G_{*H-OH}$ (eV) | $\Delta G_{*H}$ (eV) | $\Delta G_{*OH}$ (eV) | $i_0$ (Acm <sup>-2</sup> ) |
|--------------------------------------------------------------------------------|-------------------------|-------------------------|----------------------|-----------------------|----------------------------|
| Fe <sub>A</sub> -Mo <sub>2</sub> Ti <sub>2</sub> C <sub>2</sub> O <sub>2</sub> | 0.3676                  | 1.0737                  | -0.2111              | -1.5668               | -3.5697                    |
| Fe <sub>B</sub> -Mo <sub>2</sub> Ti <sub>2</sub> C <sub>2</sub> O <sub>2</sub> | 0.5264                  | 0.4592                  | 1.7797               | 0.0239                | -30.0906                   |
| Fe <sub>S</sub> -Mo <sub>2</sub> Ti <sub>2</sub> C <sub>2</sub> O <sub>2</sub> | 0.8802                  | 0.3348                  | 0.1161               | 1.2328                | -1.9635                    |
| Co <sub>A</sub> -Mo <sub>2</sub> Ti <sub>2</sub> C <sub>2</sub> O <sub>2</sub> | 0.2451                  | 0.8530                  | -0.8313              | -1.1797               | -14.0561                   |
| Co <sub>B</sub> -Mo <sub>2</sub> Ti <sub>2</sub> C <sub>2</sub> O <sub>2</sub> | -0.7968                 | 1.7020                  | 1.0859               | 0.0831                | -18.3612                   |
| Co <sub>S</sub> -Mo <sub>2</sub> Ti <sub>2</sub> C <sub>2</sub> O <sub>2</sub> | -0.5491                 | 0.6067                  | -0.0792              | 0.6505                | -1.3397                    |
| Ni <sub>A</sub> -Mo <sub>2</sub> Ti <sub>2</sub> C <sub>2</sub> O <sub>2</sub> | 0.2855                  | 1.1009                  | -0.4513              | -1.5411               | -7.6310                    |
| Ni <sub>B</sub> -Mo <sub>2</sub> Ti <sub>2</sub> C <sub>2</sub> O <sub>2</sub> | -0.5653                 | 1.0312                  | 0.1652               | 0.4244                | -2.7934                    |
| Ni <sub>S</sub> -Mo <sub>2</sub> Ti <sub>2</sub> C <sub>2</sub> O <sub>2</sub> | -0.7383                 | 1.1234                  | 0.0226               | 0.0629                | -0.3816                    |
| Ru <sub>A</sub> -Mo <sub>2</sub> Ti <sub>2</sub> C <sub>2</sub> O <sub>2</sub> | 0.3831                  | 1.8965                  | -0.1457              | -2.0335               | -2.4635                    |
| Ru <sub>B</sub> -Mo <sub>2</sub> Ti <sub>2</sub> C <sub>2</sub> O <sub>2</sub> | -0.8891                 | 0.0125                  | 0.1817               | 1.3783                | -3.0717                    |
| Ru <sub>S</sub> -Mo <sub>2</sub> Ti <sub>2</sub> C <sub>2</sub> O <sub>2</sub> | -0.7781                 | 0.2919                  | -0.0414              | 1.1997                | -0.7008                    |
| Rh <sub>A</sub> -Mo <sub>2</sub> Ti <sub>2</sub> C <sub>2</sub> O <sub>2</sub> | 0.3876                  | 0.5782                  | -0.8811              | -1.0948               | -14.8969                   |
| Rh <sub>B</sub> -Mo <sub>2</sub> Ti <sub>2</sub> C <sub>2</sub> O <sub>2</sub> | -0.7140                 | 0.3325                  | 0.2363               | 0.9188                | -3.9948                    |
| Rh <sub>S</sub> -Mo <sub>2</sub> Ti <sub>2</sub> C <sub>2</sub> O <sub>2</sub> | -0.4915                 | 0.9021                  | -0.3595              | 0.5226                | -6.0783                    |
| Pd <sub>A</sub> -Mo <sub>2</sub> Ti <sub>2</sub> C <sub>2</sub> O <sub>2</sub> | 0.2837                  | 1.1331                  | -0.4799              | -1.5222               | -8.1137                    |
| Pd <sub>B</sub> -Mo <sub>2</sub> Ti <sub>2</sub> C <sub>2</sub> O <sub>2</sub> | -0.4037                 | 1.0637                  | -0.0526              | 0.1204                | -0.8891                    |
| Pd <sub>S</sub> -Mo <sub>2</sub> Ti <sub>2</sub> C <sub>2</sub> O <sub>2</sub> | -0.3527                 | 1.6609                  | 0.0134               | -0.7866               | -0.2272                    |
| Os <sub>A</sub> -Mo <sub>2</sub> Ti <sub>2</sub> C <sub>2</sub> O <sub>2</sub> | 0.3897                  | 2.5556                  | -0.0964              | -2.3256               | -1.6295                    |
| Os <sub>B</sub> -Mo <sub>2</sub> Ti <sub>2</sub> C <sub>2</sub> O <sub>2</sub> | -1.6317                 | -0.8483                 | -1.0337              | 2.2875                | -17.4784                   |
| Os <sub>S</sub> -Mo <sub>2</sub> Ti <sub>2</sub> C <sub>2</sub> O <sub>2</sub> | -0.9359                 | 0.0786                  | 0.0254               | 1.4819                | -0.4289                    |
| Ir <sub>A</sub> -Mo <sub>2</sub> Ti <sub>2</sub> C <sub>2</sub> O <sub>2</sub> | 0.3909                  | 1.0657                  | -0.0394              | -1.6411               | -0.6655                    |
| Ir <sub>B</sub> -Mo <sub>2</sub> Ti <sub>2</sub> C <sub>2</sub> O <sub>2</sub> | -0.7937                 | -0.6342                 | -0.1074              | 1.5538                | -1.8165                    |
| Ir <sub>S</sub> -Mo <sub>2</sub> Ti <sub>2</sub> C <sub>2</sub> O <sub>2</sub> | -0.4723                 | 0.3737                  | -0.3970              | 0.8041                | -6.7125                    |
| Pt <sub>A</sub> -Mo <sub>2</sub> Ti <sub>2</sub> C <sub>2</sub> O <sub>2</sub> | 0.2860                  | 1.1875                  | -0.4691              | -1.5434               | -7.9308                    |
| Pt <sub>B</sub> -Mo <sub>2</sub> Ti <sub>2</sub> C <sub>2</sub> O <sub>2</sub> | -1.1703                 | 0.0332                  | -0.3101              | 0.9464                | -5.2426                    |
| Pt <sub>S</sub> -Mo <sub>2</sub> Ti <sub>2</sub> C <sub>2</sub> O <sub>2</sub> | -0.4051                 | 0.9475                  | -0.0356              | -0.2535               | -0.6022                    |

**Table S4** Calculated standard potentials for reactions given by Equation (1) to (4), standard conditions, 298.15 K, pH = 0.

|                 |   | $E^0(M^{z+}/Mo_2Ti_2C_3O_2)/V$ | $E^0(TM-Mo_2Ti_2C_3O_2/H-TM-Mo_2Ti_2C_3O_2)/V$ | $E^0(OH-TM-Mo_2Ti_2C_3O_2/TM-Mo_2Ti_2C_3O_2)/V$ | $E^0(H-TM-Mo_2Ti_2C_3O_2/TM-Mo_2Ti_2C_3O_2)/V$ |
|-----------------|---|--------------------------------|------------------------------------------------|-------------------------------------------------|------------------------------------------------|
| Fe <sub>A</sub> | 3 | 2.836                          |                                                |                                                 |                                                |
| Fe <sub>B</sub> | 3 | 1.047                          | -1.640                                         | 0.282                                           | 0.413                                          |
| Fe <sub>S</sub> | 3 | 0.870                          | 0.154                                          | -0.985                                          | 0.210                                          |
| Co <sub>A</sub> | 2 | 4.602                          |                                                |                                                 |                                                |
| Co <sub>B</sub> | 2 | 2.126                          | -0.464                                         | 0.223                                           | 1.014                                          |
| Co <sub>S</sub> | 2 | 2.357                          | -1.153                                         | -0.403                                          | 0.981                                          |
| Ni <sub>A</sub> | 2 | 3.740                          |                                                |                                                 |                                                |
| Ni <sub>B</sub> | 2 | 1.382                          | 0.900                                          | -0.118                                          | 0.731                                          |
| Ni <sub>S</sub> | 2 | 2.097                          | -1.321                                         | 0.184                                           | 1.259                                          |
| Ru <sub>A</sub> | 3 | 3.714                          |                                                |                                                 |                                                |
| Ru <sub>B</sub> | 3 | 0.914                          | -0.028                                         | -1.072                                          | -0.278                                         |
| Ru <sub>S</sub> | 3 | 1.515                          | -0.897                                         | -0.952                                          | 0.643                                          |
| Rh <sub>A</sub> | 3 | 2.827                          |                                                |                                                 |                                                |
| Rh <sub>B</sub> | 3 | 0.783                          | -0.332                                         | -0.613                                          | 0.471                                          |
| Rh <sub>S</sub> | 3 | 1.517                          | -0.818                                         | -0.276                                          | 0.629                                          |
| Pd <sub>A</sub> | 2 | 2.956                          |                                                |                                                 |                                                |
| Pd <sub>B</sub> | 2 | 0.781                          | -0.198                                         | 0.185                                           | 1.133                                          |

|                 |     |                              |                                                |                                                 |                                                |
|-----------------|-----|------------------------------|------------------------------------------------|-------------------------------------------------|------------------------------------------------|
| Pd <sub>S</sub> | 2   | 1.973                        | -1.646                                         | 1.033                                           | 1.824                                          |
|                 |     | $E^0(M^{z+}/Mo_2Ti_2C_3O_2)$ | $E^0(TM-Mo_2Ti_2C_3O_2/H-TM-Mo_2Ti_2C_3O_2)/V$ | $E^0(OH-TM-Mo_2Ti_2C_3O_2/TM-Mo_2Ti_2C_3O_2)/V$ | $E^0(H-TM-Mo_2Ti_2C_3O_2/TM-Mo_2Ti_2C_3O_2)/V$ |
|                 | $z$ |                              |                                                |                                                 |                                                |
|                 |     |                              |                                                |                                                 |                                                |
| Os <sub>A</sub> | 4   | 3.174                        |                                                |                                                 |                                                |
| Os <sub>B</sub> | 4   | 0.458                        | 0.389                                          | -1.981                                          | -1.005                                         |
| Os <sub>S</sub> | 4   | 1.208                        | -0.384                                         | -1.234                                          | 0.257                                          |
| Ir <sub>A</sub> | 3   | 3.342                        |                                                |                                                 |                                                |
| Ir <sub>B</sub> | 3   | 0.663                        | 0.772                                          | -1.247                                          | -0.150                                         |
| Ir <sub>S</sub> | 3   | 1.731                        | -0.370                                         | -0.557                                          | 0.687                                          |
| Pt <sub>A</sub> | 2   | 3.811                        |                                                |                                                 |                                                |
| Pt <sub>B</sub> | 2   | 0.782                        | 0.523                                          | -0.640                                          | 0.480                                          |
| Pt <sub>S</sub> | 2   | 2.692                        | -1.032                                         | 0.500                                           | 1.417                                          |

We consider the following electrochemical reaction processes on the surface of MXenes-supported metal SACs:

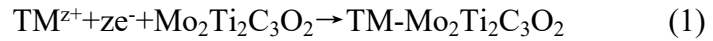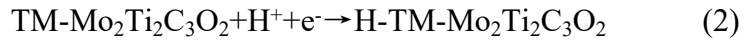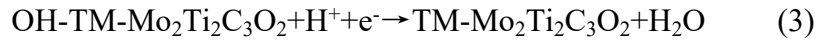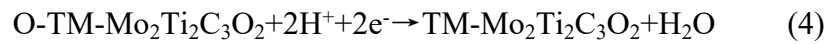

Since the TM single atom in  $TM_A-Mo_2Ti_2C_3O_2$  is not modified on the surface of  $Mo_2Ti_2C_3O_2$ , we only calculated the pourbaix diagram of the  $TM^{z+}$  confinement process (Equation (1)) in this case.

The pourbaix diagrams of  $\text{TM}_A\text{-Mo}_2\text{Ti}_2\text{C}_3\text{O}_2$ ,  $\text{TM}_B\text{-Mo}_2\text{Ti}_2\text{C}_3\text{O}_2$ , and  $\text{TM}_S\text{-Mo}_2\text{Ti}_2\text{C}_3\text{O}_2$  at 298.15K are shown in Fig. S1, S2, and S3, respectively. It can be seen from Fig. S1 that the potential of metal dissolution in  $\text{TM}_A\text{-Mo}_2\text{Ti}_2\text{C}_3\text{O}_2$  is at least 2.8 eV (see Table S4), which proves that TM single atom has high stability after anchoring to Mo defects and will not be easily dissolved from the catalyst.

In  $\text{TM}_B\text{-Mo}_2\text{Ti}_2\text{C}_3\text{O}_2$  and  $\text{TM}_S\text{-Mo}_2\text{Ti}_2\text{C}_3\text{O}_2$  (see Fig. S2 and S3), transition metal single atom is difficult to dissolve from the catalyst in all cases, which proves that the single atom site in the studied single atom catalyst has high stability under operating conditions. At  $E = 0$  eV,  $\text{Ni}_B\text{-Mo}_2\text{Ti}_2\text{C}_3\text{O}_2$  exhibits hydrogenophilic properties in all pH ranges, indicating the surface of the catalyst is easily covered by H. While the surface of  $\text{Os}_B$ ,  $\text{Ir}_B$ ,  $\text{Pt}_B$ ,  $\text{Fe}_S$ ,  $\text{Ru}_B$ ,  $\text{Rh}_B$ ,  $\text{Os}_B$ ,  $\text{Co}_S$ ,  $\text{Ru}_S$ ,  $\text{Os}_S$ ,  $\text{Ir}_S\text{-Mo}_2\text{Ti}_2\text{C}_3\text{O}_2$  will be covered by H or OH, depending on the pH value. The TM single atom in the remaining  $\text{TM-Mo}_2\text{Ti}_2\text{C}_3\text{O}_2$  (such as  $\text{Fe}_B$ ,  $\text{Co}_B$ ,  $\text{Pd}_B$ ,  $\text{Ni}_S$ ,  $\text{Pd}_S$ , and  $\text{Pt}_S\text{-Mo}_2\text{Ti}_2\text{C}_3\text{O}_2$ ) can be stably exposed under certain pH and voltage conditions.

For  $\text{Ru}_S\text{-Mo}_2\text{Ti}_2\text{C}_3\text{O}_2$ , which we finally screened out as an excellent hydrogen evolution catalyst, the adsorption of OH on the Ru site is stable at pH = 14, and the adsorption of H on the Ru site is the most stable at -1.78 V. There is a strong interaction between OH and Ru, which is consistent with the conclusion in Fig. 5a. This phenomenon indicates that the OH desorption process in the alkaline hydrogen evolution reaction is the potential determining step.

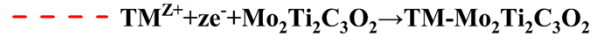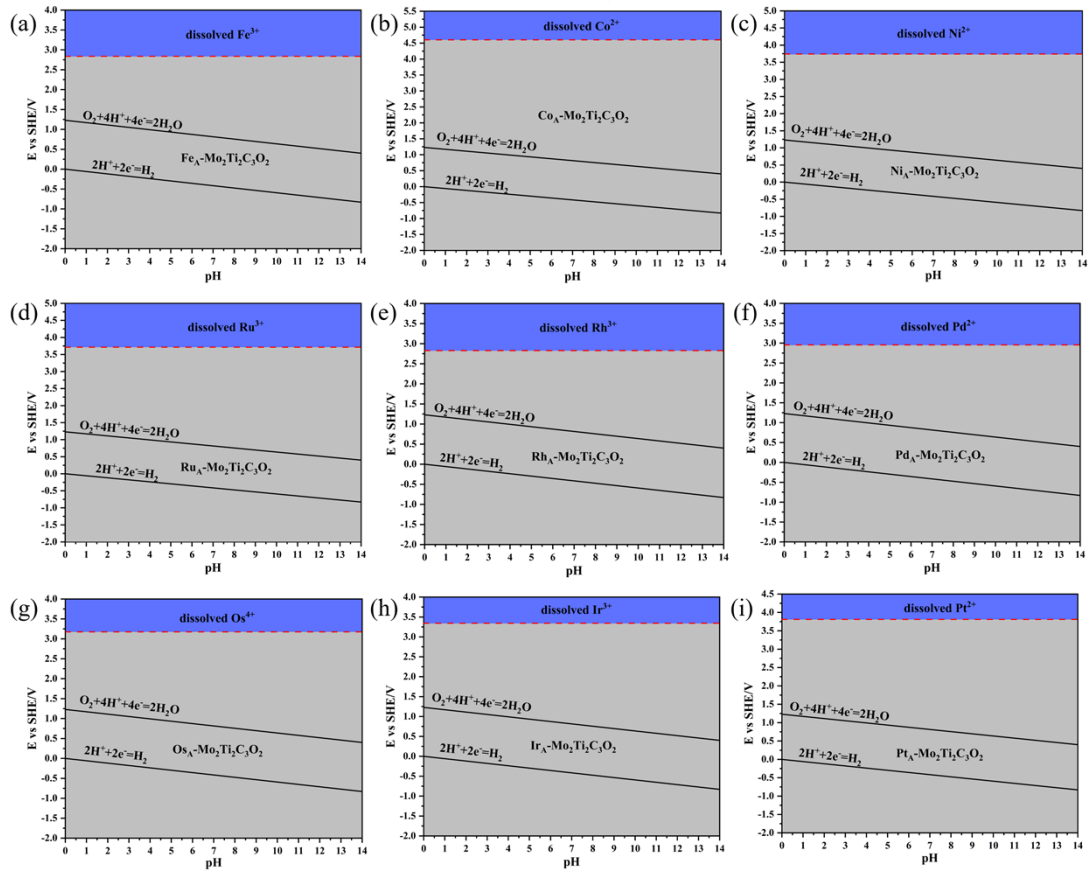

**Fig. S1** Surface Pourbaix plots for  $\text{TM}_A\text{-Mo}_2\text{Ti}_2\text{C}_3\text{O}_2$ . Thick black lines indicate the theoretical water stability region.

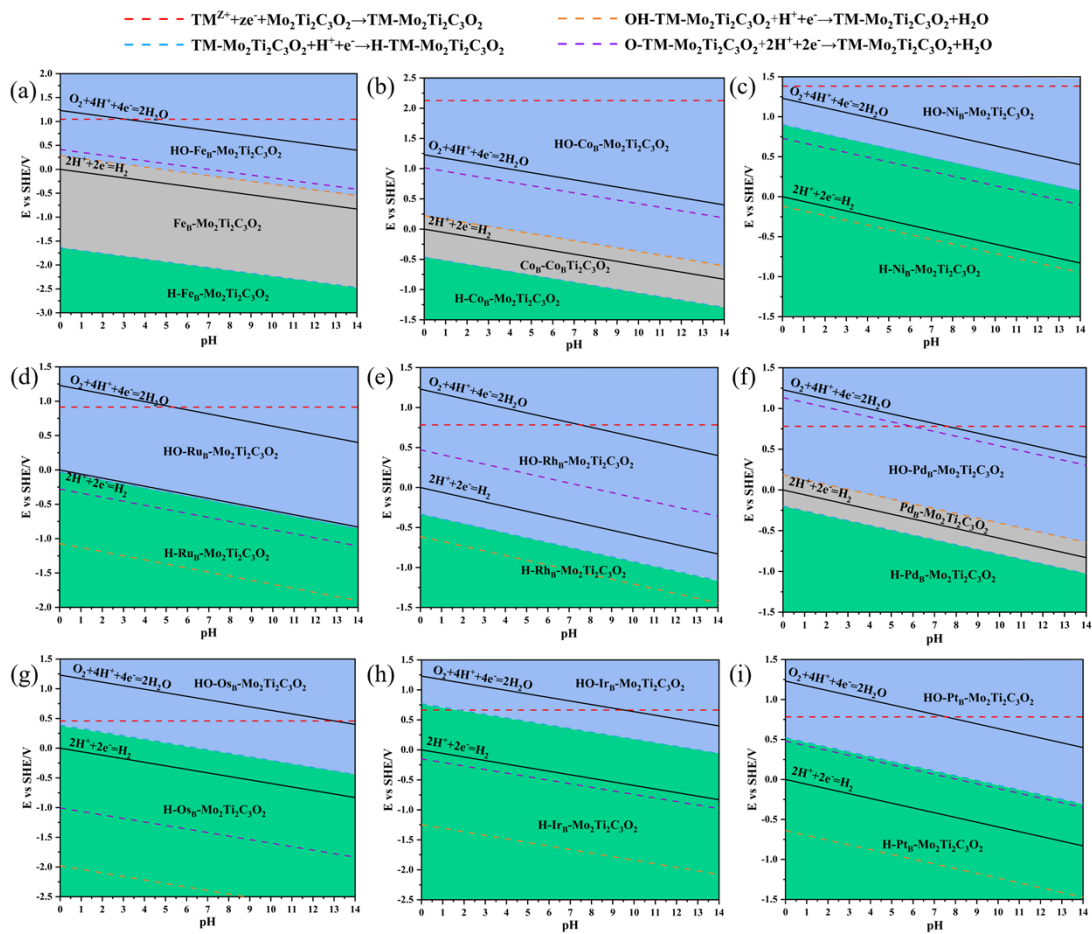

**Fig. S2** Surface Pourbaix plots for  $\text{TM}_B\text{-Mo}_2\text{Ti}_2\text{C}_3\text{O}_2$ . Thick black lines indicate the theoretical water stability region.



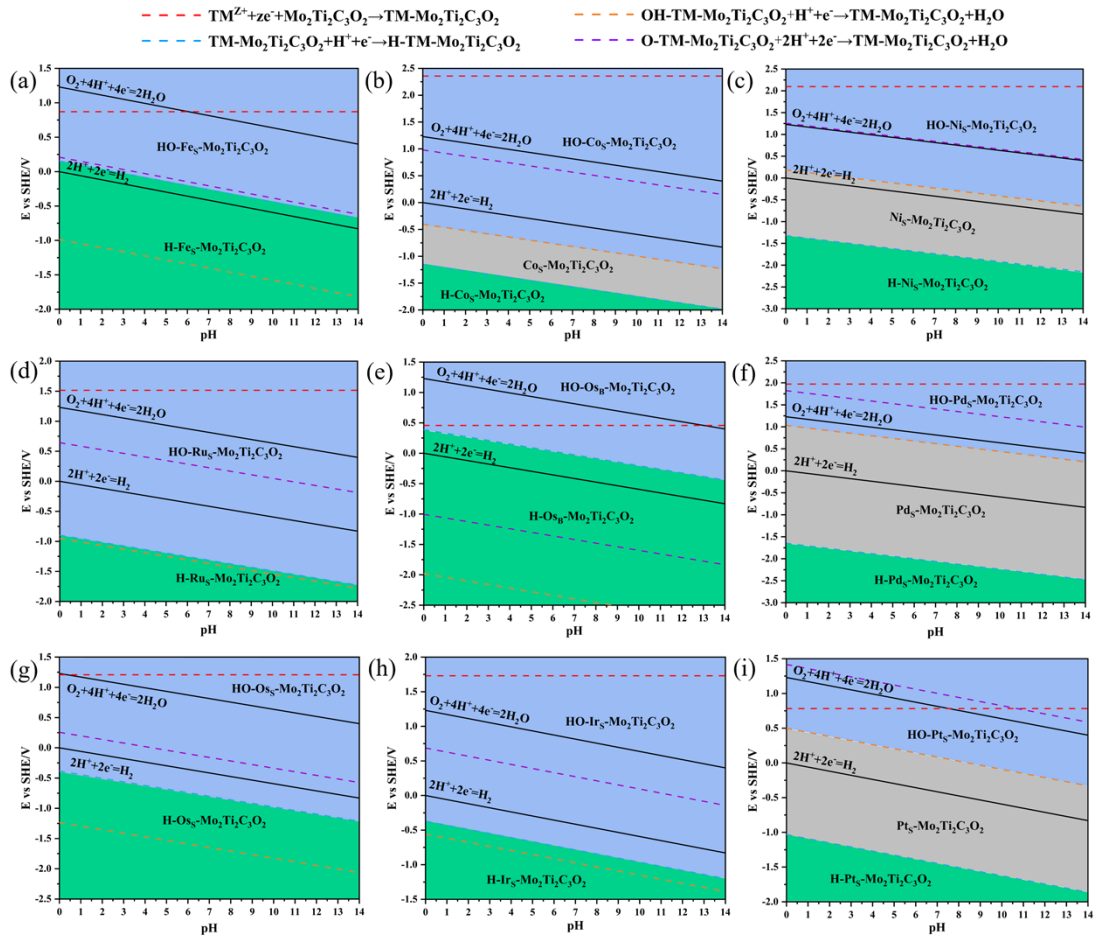

**Fig. S3** Surface Pourbaix plots for  $\text{TM}_5\text{-Mo}_2\text{Ti}_2\text{C}_3\text{O}_2$ . Thick black lines indicate the theoretical water stability region.

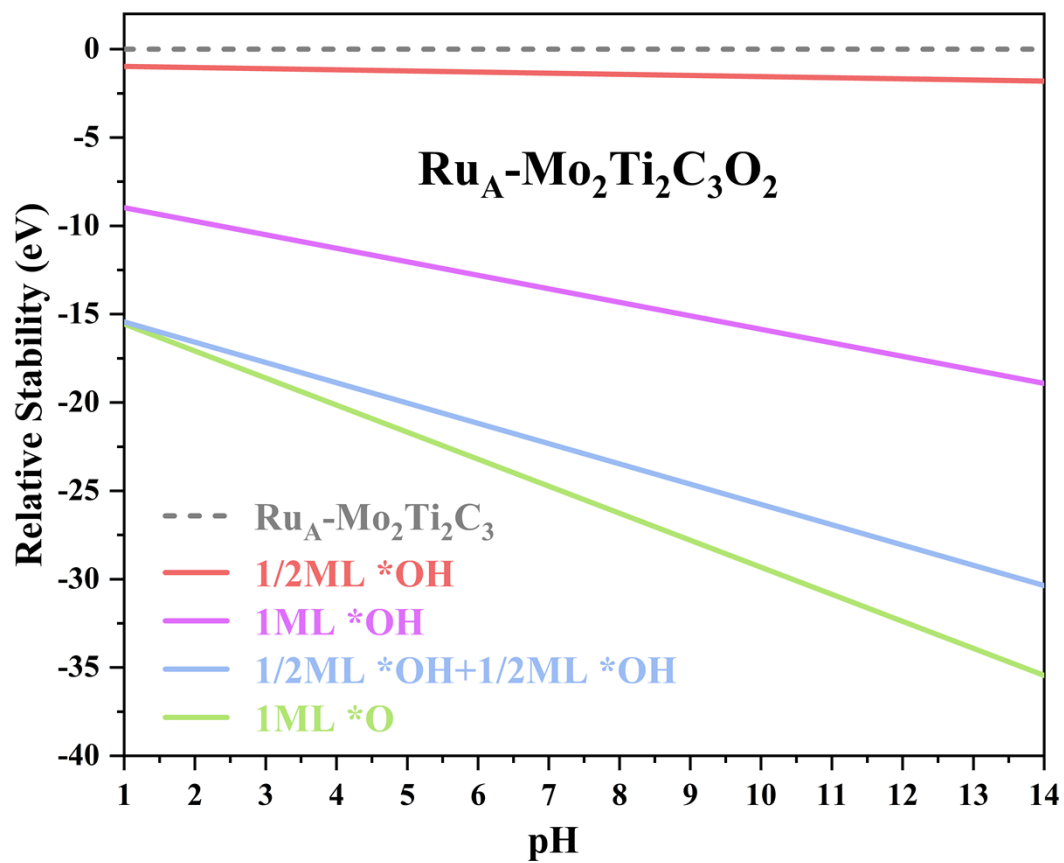

**Fig. S4** The relative stability of \*O and \*OH was terminated on Ru<sub>A</sub>-Mo<sub>2</sub>Ti<sub>2</sub>C<sub>3</sub> at

U<sub>SHE</sub> = 0 V.

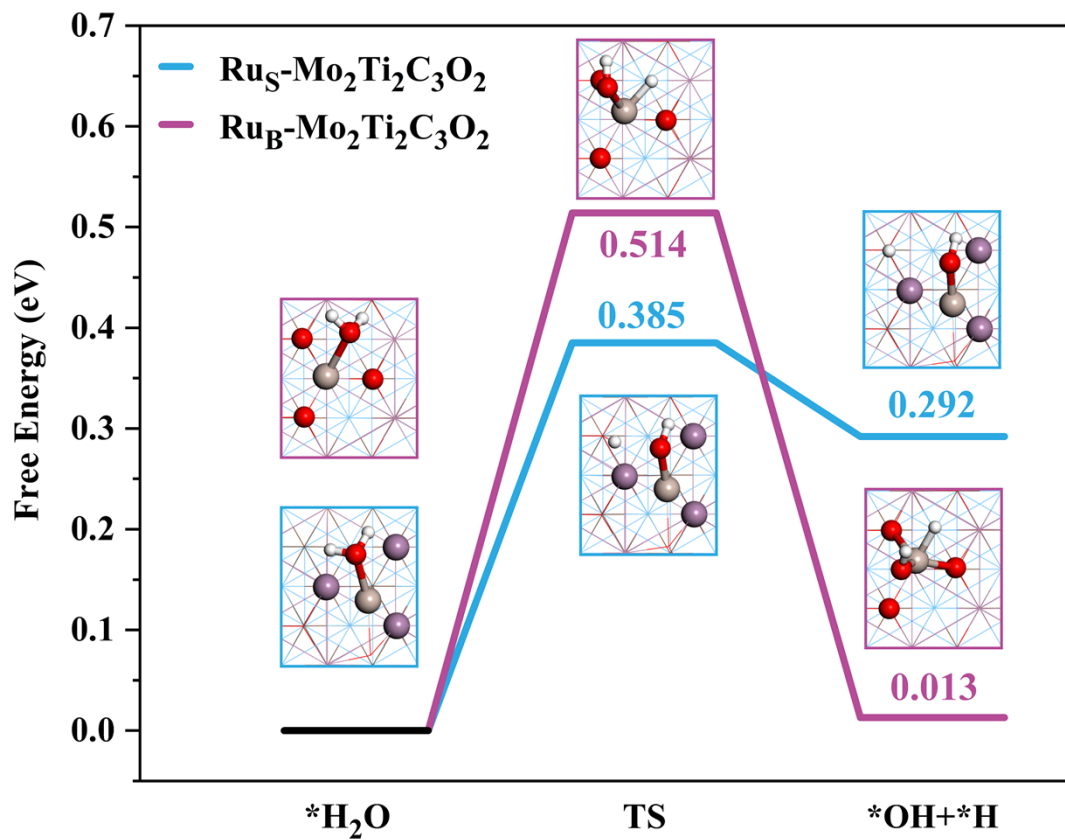

**Fig. S5** Reaction energy diagram of water dissociation on Ru<sub>S</sub>-Mo<sub>2</sub>Ti<sub>2</sub>C<sub>2</sub>O<sub>2</sub> and Ru<sub>B</sub>-Mo<sub>2</sub>Ti<sub>2</sub>C<sub>2</sub>O<sub>2</sub>.

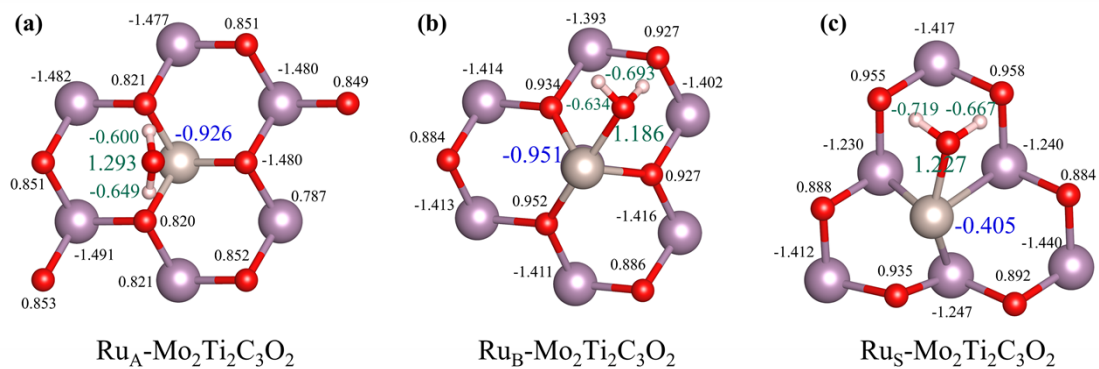

**Fig. S6** Bader charge analysis of  $\text{H}_2\text{O}$  adsorption in  $\text{Ru-Mo}_2\text{Ti}_2\text{C}_2\text{O}_2$

Through the comparison between Fig. 4d-f and Fig. S1a-c, it can be found that the Ru atom on  $\text{Ru}_A\text{-Mo}_2\text{Ti}_2\text{C}_2\text{O}_2$  obtains electrons after adsorbing  $\text{H}_2\text{O}$  molecules, indicating that this Ru atom is an electron acceptor. Similarly, the single Ru atom in  $\text{Ru}_S\text{-Mo}_2\text{Ti}_2\text{C}_2\text{O}_2$  and  $\text{Ru}_B\text{-Mo}_2\text{Ti}_2\text{C}_2\text{O}_2$  are electron donors, which is the reason for the effective activation of  $\text{H}_2\text{O}$ .
